# Supplementary material for: The proteomic landscape of genome-wide genetic perturbations
Source: PubMed Central journal article supplement (PMC7615649; doi:10.1016/j.cell.2023.03.026), 2023-04-19
Supplement: EMS193941-supplement-Table_S1_S5.pdf [file EMS193941-supplement-Table_S1_S5.pdf]

## Supplemental information

### The proteomic landscape of genome-wide genetic perturbations

Christoph B. Messner, Vadim Demichev, Julia Muenzner, Simran K. Aulakh, Natalie Barthel, Annika Röhl, Lucía Herrera-Domínguez, Anna-Sophia Egger, Stephan Kamrad, Jing Hou, Guihong Tan, Oliver Lemke, Enrica Calvani, Lukasz Szyrwił, Michael Mülleder, Kathryn S. Lilley, Charles Boone, Georg Kustatscher, and Markus Ralser

**Table S1, related to STAR methods.** Timing and mobile-phase composition for the applied non-linear chromatography gradient.

| Time (min) | Mobile phase (% A) |
|------------|--------------------|
| initial    | 97                 |
| 0.86       | 92.9               |
| 2.42       | 88.8               |
| 5.53       | 84.7               |
| 9.38       | 80.6               |
| 13.02      | 76.4               |
| 15.48      | 72.3               |
| 17.27      | 68.2               |
| 19         | 60                 |
| 20         | 20                 |
| 20.5       | 20                 |
| 21.5       | 97                 |
| 27.5       | 97                 |

**Table S2, related to STAR Methods.** Lower and upper m/z limits of precursor isolation windows in the applied variable window SWATH-MS method.

| Lower m/z | Upper m/z |
|-----------|-----------|
| 399.5     | 410.4     |
| 409.4     | 420.3     |
| 419.3     | 429.7     |
| 428.7     | 439.6     |
| 438.6     | 448.9     |
| 447.9     | 458.8     |
| 457.8     | 468.7     |
| 467.7     | 478.1     |
| 477.1     | 488.5     |
| 487.5     | 499       |
| 498       | 509.4     |
| 508.4     | 519.9     |
| 518.9     | 530.9     |
| 529.9     | 541.9     |
| 540.9     | 552.8     |
| 551.8     | 564.4     |
| 563.4     | 575.9     |
| 574.9     | 588       |
| 587       | 600.1     |
| 599.1     | 612.2     |
| 611.2     | 625.4     |
| 624.4     | 639.2     |
| 638.2     | 652.9     |

|        |        |
|--------|--------|
| 651.9  | 667.2  |
| 666.2  | 681.5  |
| 680.5  | 696.9  |
| 695.9  | 712.3  |
| 711.3  | 728.8  |
| 727.8  | 747.5  |
| 746.5  | 766.2  |
| 765.2  | 786    |
| 785    | 806.9  |
| 805.9  | 828.9  |
| 827.9  | 854.8  |
| 853.8  | 882.8  |
| 881.8  | 915.3  |
| 914.3  | 957.6  |
| 956.6  | 1015.4 |
| 1014.4 | 1098.4 |
| 1097.4 | 1249.7 |

**Table S3, related to Figure 2.** Proteins that are up-regulated upon deletion of their paralogue.

| Knock-out strain | Up-regulated protein | Fold change | Adjusted p-value |
|------------------|----------------------|-------------|------------------|
| <i>rps14aΔ</i>   | Rps14b               | 4.085177    | 6.7E-34          |
| <i>rpl4aΔ</i>    | Rpl4b                | 2.72258     | 4.6E-04          |
| <i>rpl8aΔ</i>    | Rpl8b                | 1.310114    | 6.1E-04          |
| <i>rps29bΔ</i>   | Rps29a               | 1.372421    | 2.3E-05          |
| <i>rps1aΔ</i>    | Rps1b                | 1.534089    | 1.2E-14          |
| <i>rpl6bΔ</i>    | Rpl6a                | 1.36172     | 2.4E-04          |
| <i>rnr4Δ</i>     | Rnr2                 | 6.540719    | 5.7E-119         |
| <i>rpl7aΔ</i>    | Rpl7b                | 4.987068    | 2.3E-48          |
| <i>ura7Δ</i>     | Ura8                 | 1.691639    | 1.6E-09          |
| <i>rps9bΔ</i>    | Rps9a                | 5.445963    | 4.4E-03          |
| <i>cit1Δ</i>     | Cit2                 | 2.337526    | 5.5E-03          |
| <i>rps7aΔ</i>    | Rps7b                | 1.858272    | 6.7E-13          |
| <i>rpl16bΔ</i>   | Rpl16a               | 2.150493    | 5.7E-46          |
| <i>rpl14aΔ</i>   | Rpl14b               | 1.772908    | 2.6E-06          |
| <i>rpl8bΔ</i>    | Rpl8a                | 2.291356    | 2.7E-13          |
| <i>tif4631Δ</i>  | Tif4632              | 1.952875    | 4.1E-03          |
| <i>rps29aΔ</i>   | Rps29b               | 1.473908    | 7.4E-06          |
| <i>rpl6aΔ</i>    | Rpl6b                | 2.249223    | 8.2E-39          |
| <i>sse1Δ</i>     | Sse2                 | 2.356487    | 8.0E-06          |

**Table S4, related to Figure 4.** The top 15 strains selected by the elastic net model are listed with corresponding feature importance.

| Gene name       | Feature importance |
|-----------------|--------------------|
| <i>elp4Δ</i>    | 100                |
| <i>spt10Δ</i>   | 89.19691           |
| <i>mot2Δ</i>    | 88.79057           |
| <i>ubp3Δ</i>    | 86.14195           |
| <i>def1Δ</i>    | 84.50996           |
| <i>yjl175wΔ</i> | 80.81533           |
| <i>fyv4Δ</i>    | 80.60749           |
| <i>npr3Δ</i>    | 78.62733           |
| <i>ykl169cΔ</i> | 74.90061           |
| <i>ino1Δ</i>    | 71.6569            |
| <i>get1Δ</i>    | 69.56296           |
| <i>blm10Δ</i>   | 66.9569            |
| <i>bar1Δ</i>    | 64.10587           |
| <i>seh1Δ</i>    | 59.31983           |
| <i>ecm30Δ</i>   | 58.42478           |

**Table S5, related to Figure 4.** The top 15 strains selected by the elastic net model are listed below with corresponding feature importance.

| Strain            | Feature importance |
|-------------------|--------------------|
| <i>fun30Δ</i>     | 100                |
| <i>sds24Δ</i>     | 96.3988            |
| <i>ino1Δ</i>      | 95.01005           |
| <i>ncs2Δ</i>      | 88.48427           |
| <i>ybr196c-aΔ</i> | 84.96767           |
| <i>dur12Δ</i>     | 82.29651           |
| <i>gim4Δ</i>      | 72.66398           |
| <i>mot2Δ</i>      | 70.20363           |
| <i>ybr220cΔ</i>   | 69.28264           |
| <i>vps51Δ</i>     | 59.81237           |
| <i>get1Δ</i>      | 59.42979           |
| <i>rps11bΔ</i>    | 56.14677           |
| <i>bud25Δ</i>     | 55.60507           |
| <i>ydr048cΔ</i>   | 53.71978           |
| <i>sbe2Δ</i>      | 53.65612           |
